# Supplementary material for: Tb(HSO4)(SO4) – a green emitting hydrogensulfate sulfate with second harmonic generation response
Source: Royal Society of Chemistry journal article supplement (doi:10.1039/c9dt03436f), 2019-01-01
Supplement: c9dt03436f1.pdf [file c9dt03436f1.pdf]

## Supplementary Information

### Tb(HSO<sub>4</sub>)(SO<sub>4</sub>) – A Green Emitting Hydrogensulfate Sulfate with Second Harmonic Generation Response

Philip Netzsch,<sup>a</sup> Harijs Bariss,<sup>a</sup> Lkhamsuren Bayarjargal,<sup>b</sup> and Henning A. Höpfe<sup>\*,a</sup>

<sup>a</sup> Chair of Solid State and Materials Chemistry, University of Augsburg, Universitätsstraße 1, D-86159 Augsburg, Germany

<sup>b</sup> Institut für Geowissenschaften, Universität Frankfurt, Altenhöferallee 1, D-60438 Frankfurt, Germany

Table S1: Wyckoff symbol, atomic coordinates *x*; *y*; *z* and equivalent isotropic displacement parameters *U*<sub>eq</sub> for Tb(HSO<sub>4</sub>)(SO<sub>4</sub>) (corresponding standard deviations given in parentheses)

| Atom | Wyckoff symbol | <i>x</i>   | <i>y</i>    | <i>z</i>    | <i>U</i> <sub>eq</sub> |
|------|----------------|------------|-------------|-------------|------------------------|
| Tb01 | 2 <i>a</i>     | 0.35019(4) | 0.74999(7)  | 0.63157(4)  | 0.00544(8)             |
| S1   | 2 <i>a</i>     | 0.7801(2)  | 0.70420(19) | 0.4304(2)   | 0.0062(3)              |
| S2   | 2 <i>a</i>     | 0.2397(2)  | 0.5805(2)   | 0.1047(2)   | 0.0067(3)              |
| O11  | 2 <i>a</i>     | 0.9877(6)  | 0.7299(13)  | 0.5621(7)   | 0.0106(11)             |
| O12  | 2 <i>a</i>     | 0.6845(8)  | 0.9008(7)   | 0.3641(8)   | 0.0140(11)             |
| O13  | 2 <i>a</i>     | 0.7803(7)  | 0.5722(7)   | 0.2560(7)   | 0.0094(9)              |
| O14  | 2 <i>a</i>     | 0.6455(7)  | 0.5907(7)   | 0.5396(7)   | 0.0092(9)              |
| O21  | 2 <i>a</i>     | 0.2410(7)  | 0.7037(6)   | 0.2819(7)   | 0.0116(11)             |
| O22  | 2 <i>a</i>     | 0.3179(8)  | 0.6908(7)   | -0.0441(7)  | 0.0134(11)             |
| O23  | 2 <i>a</i>     | 0.3500(8)  | 0.3905(7)   | 0.1617(7)   | 0.0132(10)             |
| O24  | 2 <i>a</i>     | 0.0144(13) | 0.5299(9)   | -0.0008(14) | 0.0107(13)             |
| H1   | 2 <i>a</i>     | -0.055(11) | 0.542(12)   | 0.102(11)   | 0.016                  |

Table S2: Anisotropic displacement parameters  $U_{ij}$  in  $\text{\AA}^2$  for  $\text{Tb}(\text{HSO}_4)(\text{SO}_4)$  (corresponding standard deviations given in parentheses)

| Atom | U11         | U22         | U33         | U23         | U13        | U12         |
|------|-------------|-------------|-------------|-------------|------------|-------------|
| Tb01 | 0.00601(12) | 0.00483(12) | 0.00575(12) | -0.0006(2)  | 0.00201(8) | -0.0005(2)  |
| S1   | 0.0056(7)   | 0.0048(9)   | 0.0090(7)   | -0.0003(5)  | 0.0031(6)  | -0.0002(5)  |
| S2   | 0.0064(7)   | 0.0079(7)   | 0.0059(7)   | 0.0005(6)   | 0.0018(6)  | 0.0000(6)   |
| O11  | 0.0053(18)  | 0.011(3)    | 0.015(2)    | 0.000(3)    | 0.0002(15) | -0.003(2)   |
| O12  | 0.014(3)    | 0.005(2)    | 0.023(3)    | 0.000(2)    | 0.004(2)   | 0.0038(18)  |
| O13  | 0.010(2)    | 0.009(2)    | 0.010(2)    | -0.0013(18) | 0.0035(19) | -0.0019(17) |
| O14  | 0.009(2)    | 0.009(2)    | 0.012(2)    | -0.0007(18) | 0.0062(19) | 0.0012(17)  |
| O21  | 0.016(2)    | 0.011(3)    | 0.007(2)    | -0.0035(16) | 0.0012(18) | 0.0012(17)  |
| O22  | 0.016(3)    | 0.018(3)    | 0.007(2)    | 0.0041(17)  | 0.0054(19) | -0.0031(17) |
| O23  | 0.014(3)    | 0.012(2)    | 0.013(3)    | 0.0011(19)  | 0.003(2)   | 0.0048(19)  |
| O24  | 0.007(3)    | 0.015(4)    | 0.011(2)    | 0.002(3)    | 0.0034(19) | 0.000(3)    |

Table S3: ECon derived by MAPLE-calculations for Tb atoms in  $\text{Tb}(\text{HSO}_4)(\text{SO}_4)$

| Atom         | x       | y       | z      | Distance /<br>pm | EcoN (1) | Econ(3) |
|--------------|---------|---------|--------|------------------|----------|---------|
| Central atom |         |         |        |                  |          |         |
| Tb1          | 0.3502  | 0.1721  | 0.6316 |                  |          |         |
| Ligand       |         |         |        |                  |          |         |
| O22          | 0.3179  | 0.1129  | 0.9559 | 230.32           | 1.154    | 1.161   |
| O12          | 0.3155  | -0.1772 | 0.6359 | 231.571          | 1.122    | 1.129   |
| O23          | 0.65    | 0.3125  | 0.8383 | 232.307          | 1.103    | 1.11    |
| O21          | 0.241   | 0.1258  | 0.2819 | 232.539          | 1.097    | 1.104   |
| O11          | -0.0123 | 0.1521  | 0.5621 | 234.045          | 1.058    | 1.065   |
| O14          | 0.6455  | 0.0128  | 0.5396 | 244.356          | 0.801    | 0.808   |
| O13          | 0.2197  | 0.4942  | 0.744  | 248.678          | 0.699    | 0.706   |
| O14          | 0.3545  | 0.5128  | 0.4604 | 253.396          | 0.595    | 0.601   |
| Next Ligand  |         |         |        |                  |          |         |
| O12          | 0.6845  | 0.3228  | 0.3641 | 335.86           | 0.001    | 0.001   |

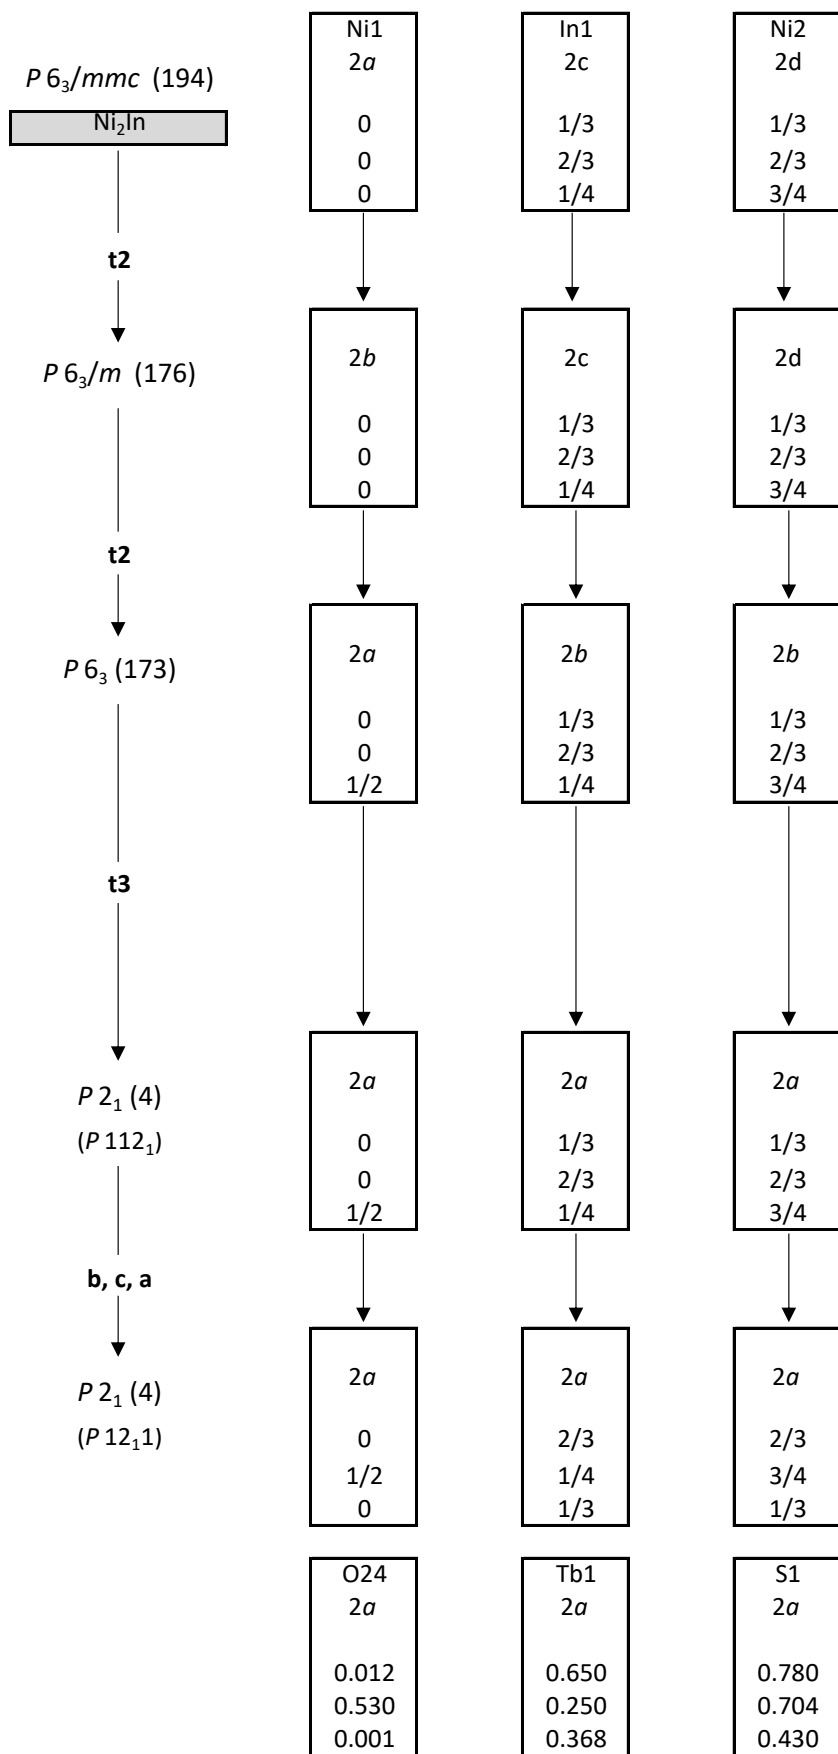

Figure S1: Group-subgroup relation scheme between  $Ni_2In$  and O (protonated oxygen atom from the hydrogensulfate anion), S (sulfur from the sulfate anion) and Tb in  $Tb(HSO_4)(SO_4)$ .

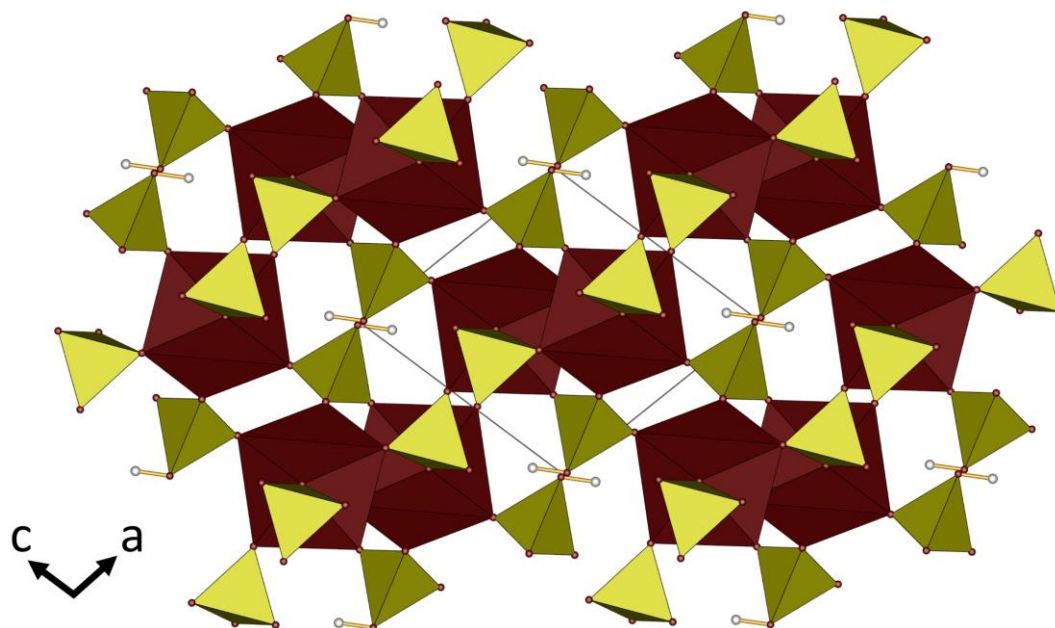

Figure S2: 3D network formed by  $\text{Tb}(\text{HSO}_4)_{3/3}(\text{SO}_4)_{4/4}$  units viewed along [010].

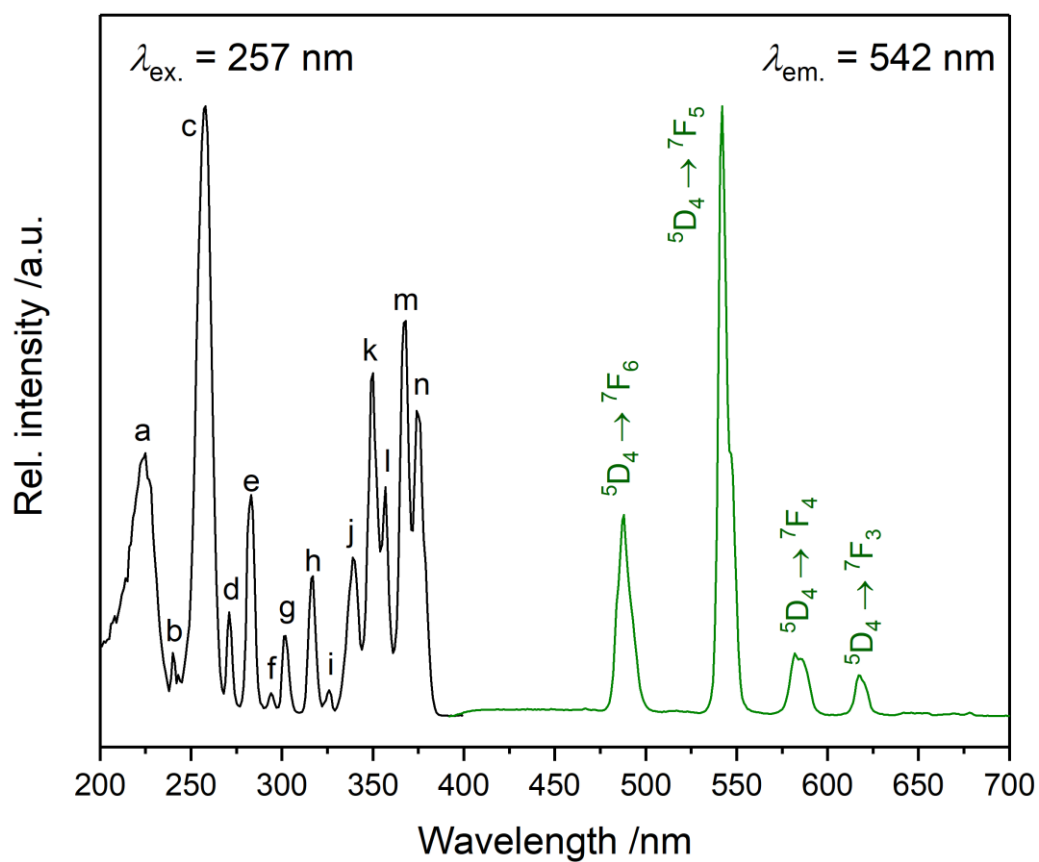

Figure S3: Corrected excitation (black) and emission (green) spectra of  $\text{Tb}(\text{HSO}_4)(\text{SO}_4)$ ; the assignment of the excitation spectrum is listed in table S4

Table S4: Assignment of the excitation bands in Tb(HSO<sub>4</sub>)(SO<sub>4</sub>) according to Carnall<sup>1</sup>

| Band | Transition <sup>7</sup> F <sub>6</sub> →                  | Wavelength /nm |
|------|-----------------------------------------------------------|----------------|
| a    | <i>5d</i>                                                 | 224            |
| b    | <sup>5</sup> K <sub>7</sub>                               | 240            |
| c    | <i>5d</i>                                                 | 258            |
| d    | <sup>5</sup> I <sub>7</sub>                               | 271            |
| e    | <sup>5</sup> I <sub>8</sub>                               | 283            |
| f    | <sup>5</sup> H <sub>5</sub>                               | 294            |
| g    | <sup>5</sup> H <sub>6</sub>                               | 302            |
| h    | <sup>5</sup> H <sub>7</sub>                               | 317            |
| i    | <sup>5</sup> D <sub>1</sub>                               | 326            |
| j    | <sup>5</sup> L <sub>7</sub> + <sup>5</sup> L <sub>8</sub> | 339            |
| k    | <sup>5</sup> L <sub>9</sub>                               | 350            |
| l    | <sup>5</sup> G <sub>5</sub>                               | 357            |
| m    | <sup>5</sup> L <sub>10</sub>                              | 368            |
| n    | <sup>5</sup> G <sub>6</sub>                               | 374            |

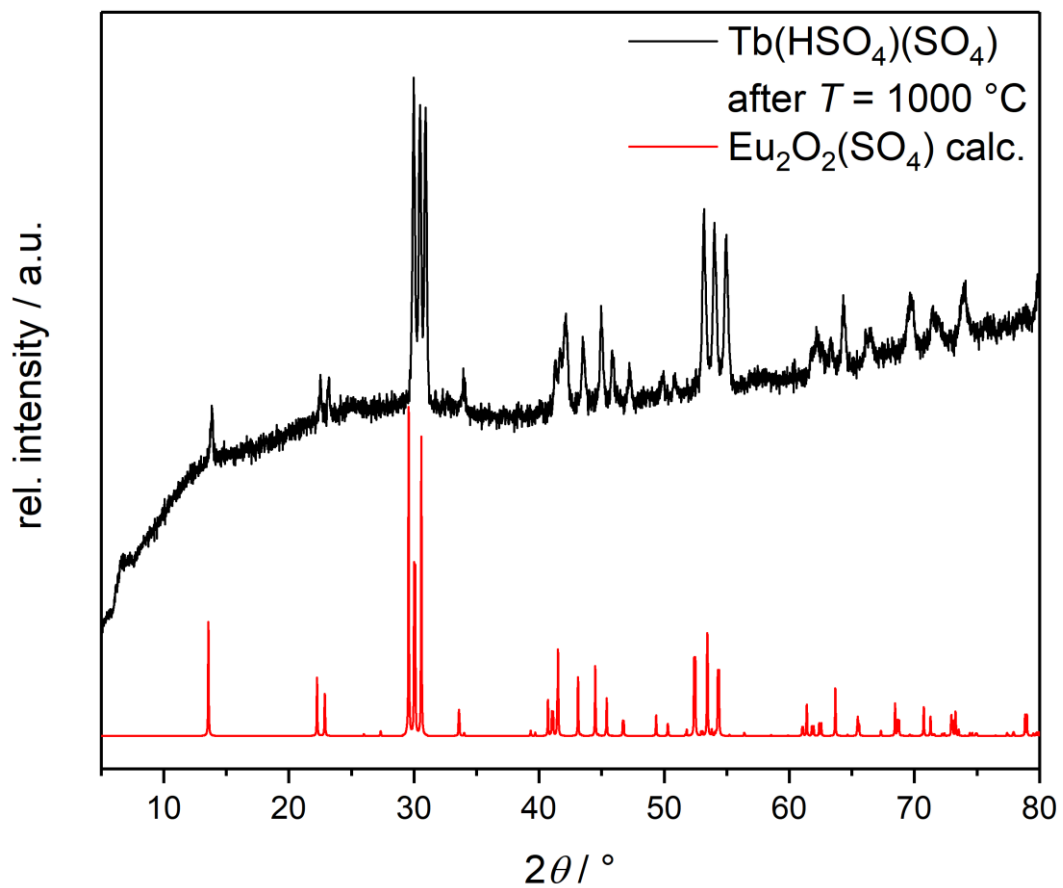

Figure S4: PXRD of a sample of Tb(HSO<sub>4</sub>)(SO<sub>4</sub>) after thermogravimetric analysis to 1000 °C in comparison to the calculated pattern of Eu<sub>2</sub>O<sub>2</sub>(SO<sub>4</sub>).<sup>2</sup>

## References

- 1 W. T. Carnall, P. R. Fields and K. Rajnak, *J. Chem. Phys.*, 1968, **49**, 4447–4449.
- 2 I. Hartenbach and T. Schleid, *Z. Anorg. Allg. Chem.*, 2002, **628**, 2171.
